# Supplementary material for: Overexpression of calmodulin-like (ShCML44) stress-responsive gene from Solanum habrochaites enhances tolerance to multiple abiotic stresses
Source: PubMed Central journal article supplement (PMC4992891; doi:10.1038/srep31772), 2016-08-22

## **Supplementary material**

### **Overexpression of calmodulin-like (*ShCML44*) stress-responsive gene from *Solanum habrochaites*, enhances tolerance to multiple abiotic stresses**

Shoaib Munir<sup>1</sup>, Liu Hui<sup>2</sup>, Xing Yali<sup>1</sup>, Saddam Hussain<sup>3</sup>, Bo Ouyang<sup>1</sup>, Yuyang Zhang<sup>1</sup>, Hanxia Li<sup>1</sup>, Zhibiao Ye<sup>1\*</sup>

<sup>1</sup>Key Laboratory of Horticultural Plant Biology (Ministry of Education), College of Horticulture and Forestry Sciences, Huazhong Agricultural University, Wuhan 430070, China

<sup>2</sup>Key Laboratory of Biology and Genetic Resources of Rubber Tree, Ministry of Agriculture, Rubber Research Institute, Chinese Academy of Tropical Agricultural Sciences, Danzhou 571737, China

<sup>3</sup>College of Resources and Environment, Huazhong Agricultural University, Wuhan 430070, China

\*Corresponding author: Zhibiao Ye

E-mail: [zbye@mail.hzau.edu.cn](mailto:zbye@mail.hzau.edu.cn)

Fax: +86-27-87282010

**Table S1.** List of primer sequences.

| <b>Gene</b>                                 | <b>Forward primer</b>   | <b>Reverse primer</b>   |
|---------------------------------------------|-------------------------|-------------------------|
| <b>For gene amplification and qRT-PCR</b>   |                         |                         |
| <i>ShCML</i>                                | TCATGTCTCCGATCAACTCAAT  | TTGGTAGATTGTAAGCGGGATT  |
| <i>β-actin</i>                              | ATGGCAGACGGAGAGGATATTCA | AGACGGAGAATGGCATGTGG    |
| <i>EF1a</i>                                 | CGTGGTTATGTTGCCTCAAA    | ACAGCAATGTGGGAAGTGTG    |
| <b>For promoter amplification</b>           |                         |                         |
| PCML                                        | TCGGAGGCAAAATTAAGGAA    | TGACGCGAAATAATGATGCT    |
| <b>For transgenic plants identification</b> |                         |                         |
| <i>ShCML</i>                                | TCATGTCTCCGATCAACTCAAT  | TTGGTAGATTGTAAGCGGGATT  |
| CaMV35S                                     | ACGCACAATCCCACTATCCTT   |                         |
| <b>For qRT-PCR</b>                          |                         |                         |
| <i>CML</i>                                  | ATGTCTCCGATCAACTCAAT    | TACCAAGTAGCAACTCTAGC    |
| <i>SOD</i>                                  | TTTCTGGGAAGCAAATCGTC    | TTGGGCAATGAAGAAGAAGC    |
| <i>Peroxidase</i>                           | CTTGCCCTAATGCTCTCACC    | GCATCACAACCCTGAACAAA    |
| <i>GST</i>                                  | GCAAGCCCATTGTGAGTCT     | TGCTGACCCCTTATCATCG     |
| <i>LOX</i>                                  | TCATTTTCCCCTGGCAAGTA    | TGGTGCATTTGGATCTTCT     |
| <i>PR1</i>                                  | GGATTGACACCAGCAGAATC    | CCATGTAACCCCAATGCCTA    |
| <i>PR2</i>                                  | ATGGGCTGAAGGATCAGTTG    | GACACTCTTCTTGAACCTTGTGG |
| <i>Catalase</i>                             | TCCCAGTTAATGCTCCCAAG    | CTCAGCAGGACGACAAGGAT    |
| <i>sucrose synthase</i>                     | GTGGAGACCGAAGAAAGGAA    | GGGAAGAAATCCATCGGAAC    |
| <i>β-amylase</i>                            | GCATTCGTGCCAACTTATCTT   | GATTTCCACTCCGTGCTTTC    |
| <i>Hsp90-1</i>                              | GCACTTCTCTGTTGAAGGTCAG  | ATGAACACACGGCGAACATA    |
| <i>ERD1</i>                                 | CAGAACTGGCCTCAAGCAC     | AGCATGGCAGATTCAGATCC    |
| <i>ERD2</i>                                 | ATTTTGAGTGGCGAGGGTAA    | TTGGGATAGTCGTGTTTCTGG   |

## Supplementary Figures legend

**Figure S1.** Alignment of *ShCML44* nucleotide sequence with sequences from *S. lycopersicum* (*SlCML44*) and *S. pennellii* (*SpCML44*). Multiple sequence alignments were conducted using ClustalW2.

**Figure S2.** Phylogenetic analysis of *Solanum habrochaites* (*ShCML44*), *S. lycopersicum* (*SlCML44*) and *S. pennellii* (*SpCML44*) proteins with other species CML proteins.

**Figure S3.** *ShCML44* overexpression plants response towards drought tolerance in tomato. Comparison of plant height (a), number of leaves per plant (b), leaf length (c) leaf width (d), of transgenic and wild-type plants under normal and drought stress conditions.

Figure S1

```
SlCML      ATGTCTCCGATCAACTCAATTAATTTGTCAAAAATCTTCTCAAAGCTTGACAAGAATGGT
SpCML      ATGTCTCCGATCAACTCAATTAATTTGTCAAAGATCTTCTCAAAGCTTGACAAGAATGGT
ShCML      ATGTCTCCGATCAACTCAATTAATTTGTCAAAAATCTTCTCAAAGCTTGACAAGAATGGT
*****.*****

SlCML      GATGGCCTTGTGTGTCCTTGATGAGTTAAAGGGATTTCTTGATACAATAGGAATTATTGCA
SpCML      GATGGCCTTGTGTGTCCTTGATGAGTTAAAGGGATTTCTTGATACAATAGGAATTATTGCA
ShCML      GATGGCCTTGTGTGTCCTTGATGAGTTAAAGGGATTTCTTGATACAATAGGAATTATTGCA
*****

SlCML      AGCCAAGAGGAGCTAGAGTTGCTACTTGGTAAAACAAGCCTAGACTCCATTGATTTTTTC
SpCML      AGCCAAGAGGAGCTAGAGTTGCTACTTGGTAAAACAAGCCTAGACTTCATTGATTTTTTC
ShCML      AGCCAAGAGGAGCTAGAGTTGCTACTTGGTAAAACAAGCCTAGACTCCATTGATTTTTTC
*****

SlCML      TTCTTCTATGATGCTATCACAAGGCAAATATTAATAAAGGTAGCAATTATAAGCACGAG
SpCML      TTCTTCTATGATGCTATCACAAGGCAAATATTAATAAAGGTAGCAATTATAAGCACGAG
ShCML      TTCTTCTATGATGCTATCACAAGGCAAATATTAATAAAGGTAGCAATTATAAGCACGAG
*****.*****

SlCML      GATCGAGAAAATGTTTCTTGGAAAATGACCTACGTAAAGTGTTTAGAGTATTGATTTA
SpCML      GATCGAGAAAATGTTTCTTGGAAAATGACCTACGTAAAGTGTTTAGAGTATTGATTTA
ShCML      GATCGAGAAAATGTTTCTTGGAAAATGACCTACGTAAAGTGTTTAGAGTATTGATTTA
*****

SlCML      AACGAGGACGGATTCAATATGTTGTGAGGAGCTGCAAAGAGCATTGTCAAGATTAGGATTG
SpCML      AACGAGGACGGATTCAATATGTTGTGAGGAGCTGCAAAGAGCATTGTCAAGATTAGGATTG
ShCML      AACGAGGACGGATTCAATATGTTGTGAGGAGCTGCAAAGAGCATTGTCAAGATTAGGATTG
*****

SlCML      TGGGATGAACAATGTGGGAAAGATTGTAAGAGTATGATCAATGTTTATGACAAAAATTA
SpCML      TGGGATGAACAATGTGGGAAAGATTGTAAGAGTATGATCAATGTTTATGACAAAAATTA
ShCML      TGGGATGAACAATGTGGGAAAGATTGTAAGAGTATGATCAATGTTTATGACAAAAATTA
*****

SlCML      GATGGAAAACCTTGATTATGAGGAGTTTAAAGACATGATGTTTGATAAATTA
SpCML      GATGGAAAACCTTGATTATGAGGAGTTTAAAGACATGATGTTTGATAAATTA
ShCML      GATGGAAAACCTTGATTATGAGGAGTTTAAAGACATGATGTTTGATAAATTA
*****
```

Figure S2

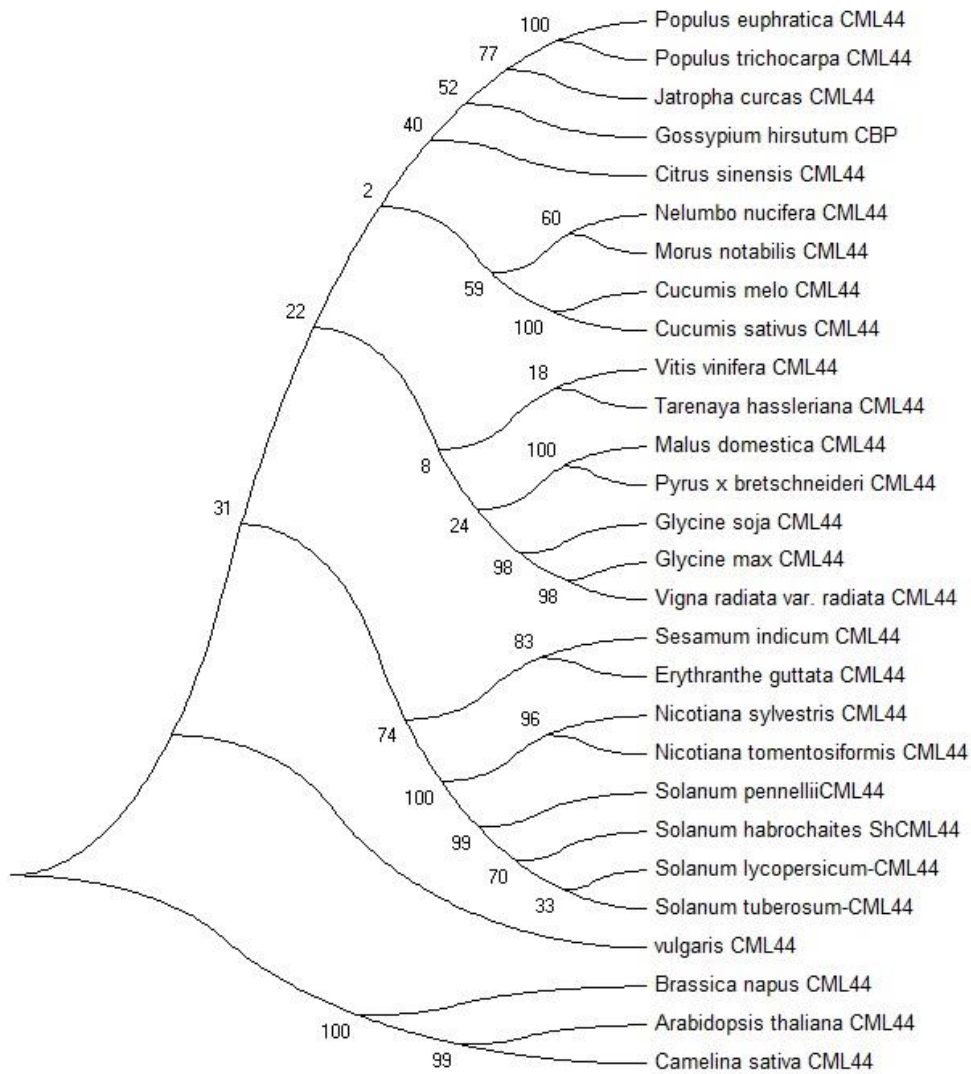

Figure S3

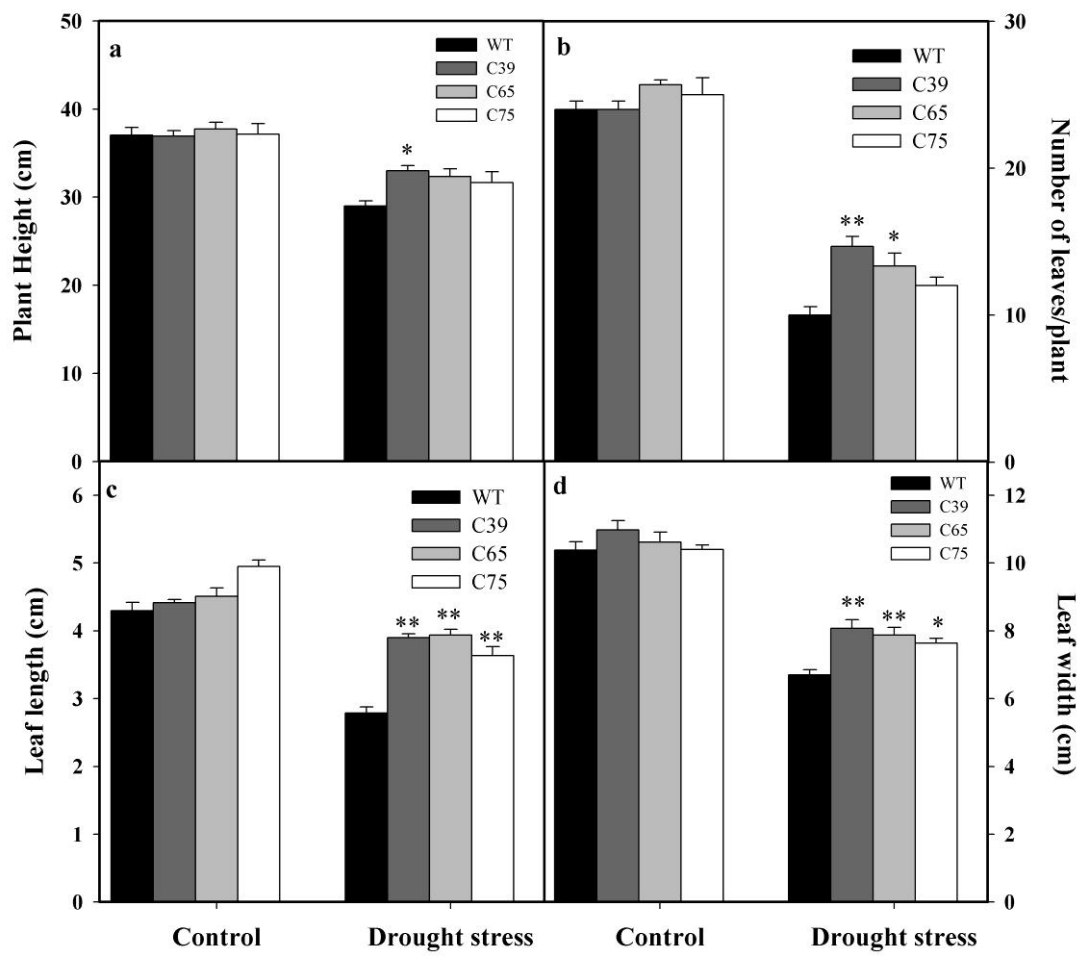

Supplement: srep31772-s1.pdf [file srep31772-s1.pdf]
